# Supplementary material for: Exploring the Landscape of Routine Immunization in Nigeria: A Scoping Review of Barriers and Facilitators
Source: Preprints.org preprint supplement (doi:10.20944/preprints202405.1388.v1), 2024-05-21
Supplement: Supplementary file 1 [file supplementary]

## Sheet: Sheet1
StudyID	YearofPublication	Title	Aimofstudy	State	Region	StudyDesign	Tools	Vaccinationassessed	Totalnumberofparticipants	CaregiverDoctorNumber	CaregiverNursesNumber	CaregiverMLSNumber	CaregiverCommunityHealthExtessionWorkerNumber	CaregiverFatherNumber	CaregiverMotherNumber	CommunityInfluencersPoliticalNumber	CommunityInfluencersTraditionalNumber	CommunityInfluencersFemaleNumber	HealthcareworkersNumber	CaregiverGrandmothersNumber	CommunityInfluencersMaleNumber	DistrictHeadNumber	LGAOfficialsNumber	StateMinistryofHealthOfficialsNumber	WardCommitteemembersNumber	ChildrenNumber	BarriersConceptstargeted	CaregiverrelatedFacilitators	PeerInfluence1or0	CulturalandReligiousSensitivity1or0	PositivePersonalBeliefs1or0	ReminderSystems1or0	HealthLiteracy1or0	FinancialSupport1or0	SocialSupport1or0	ConvenienceofAccess1or0	TrustinHealthcareProviders1or0	KnowledgeandAwarenessofimmunization1or0	NonfinancialIncentive1or0	PerceivedBenefitsofvaccines1or0	MaternalAgeatChildbirth1or0	PostsecondaryandhigherMaternalEducation1or0	HighHouseholdWealth1or0	MaternalaccesstohealthcareServices1or0	Fullyemployedmothers1or0	Birthorder1or0	Childage1or0	Preferenceforfemaleimmunizationserviceprovider1or0	Fearofconsequenceofnonimmunization1or0
Sadoh 2013	2013	Factors contributing to delay in commencement of immunization in Nigerian infants	examined prospectively factors contributing to delay in the commencement of infant immunisation in Benin City, Nigeria.	Edo	SS	Qualitative	Interviews	Childhood vaccines	153	0	0	0	0	0	153	0	0	0	0	0	0	0	0	0	0	0		#NULL!	0	0	0	0	0	0	0	0	0	0	0	0	0	1	1	0	0	0	0	0	0
Gidado et al	2019	Determinants of routine immunization coverage in Bungudu, Zamfara State, Northern Nigeria, May 2010. Pan Afr Med J. 2014; 18 (Suppl 1)	to identify the determinants of routine immunization coverage in this community.	Zamfara	NW	Qualitative	Questionnaire	Childhood vaccines	450	0	0	0	0	0	450	0	0	0	0	0	0	0	0	0	0	0		#NULL!	0	0	0	0	0	0	0	0	0	1	0	0	0	1	0	0	0	0	0	0	0
Alhassan 2016	2016	Determinants of Immunization Coverage in Children 12-23 Months in Miga Local Government Area, Jigawa State Nigeria	to evaluate the determinants of the low immunization coverage in children aged 12-23 months in order to formulate/recommend public health interventions to revitalize the routine immunization activities in the Local government area	Jigawa	NW	Mixed Method	Questionnaire	Childhood vaccines	390	0	0	0	0	0	390	0	0	0	0	0	0	0	0	0	0	0		#NULL!	0	0	0	0	0	0	0	0	0	0	0	0	0	0	0	0	0	0	0	0	0
Odusanya et al. 2008	2008	Determinants of vaccination coverage in rural Nigeria | BMC Public Health | Full Text	to assess vaccination coverage and its determinants in this rural community in Nigeria	Edo	SS	Qualitative	Interviews	Childhood vaccines	678	0	0	0	0	0	0	339	0	0	0	0	0	0	0	0	0	339	Care-give related	#NULL!	0	0	0	0	0	0	0	0	0	1	0	0	0	1	0	0	0	0	0	0	0
Nwokocha 2016	2016	Social and cultural factors influencing immunization of children in rural Abia State, Nigeria	to investigate the socio- cultural factors influencing childhood immunization in the rural state of Abia,	Abia	SE	Mixed Method	Questionnaire	Childhood vaccines	364	0	0	0	0	0	364	0	0	0	0	0	0	0	0	0	0	0	Care-give related	#NULL!	0	0	0	0	0	0	0	0	0	0	0	0	0	0	0	0	0	0	0	0	0
Ipsos Global Health	2021	Socio-demographic determinants of childhood immunization incompletion in Koforidua, Ghana	To provide rigorous and evidence-based information on the drivers and barriers to complete childhood immunisation in Nigeria	Multi-states	Multi-sta	Mixed Method	Other: all	Childhood vaccines	3048	0	0	0	0	612	1300	0	0	0	0	593	543	0	0	0	0	0		#NULL!	0	1	0	0	0	0	1	0	1	0	0	0	0	0	0	0	0	0	0	0	0
M-Rite 2023	2023	Coverage and determinants of childhood immunization in Nigeria: A systematic review and meta-analysis	to conduct a baseline assessment of the immunization landscape in each state to provide up-to-date quality data on RI/PHC performance and key strengths	Multi-states	Multi-sta	Mixed Method	Other: Combination of al the methods	Childhood vaccines	0	0	0	0	0	0	0	0	0	0	0	0	0	0	0	0	0	0		#NULL!	0	0	0	0	0	0	0	0	0	0	0	0	0	0	0	0	0	0	0	0	0
Antai 2011	2011	Rural-urban inequities in childhood immunisation in Nigeria: The role of community contexts	To assess the role of community contexts on rural-urban inequities in full immtmisation uptake amongst children 12 months of age and older	National	National	Mixed Method	Analysis of secondary data	Childhood vaccines	3725	0	0	0	0	0	3725	0	0	0	0	0	0	0	0	0	0	0	Care-give related; Community/Social context	#NULL!	0	0	0	0	0	0	0	0	0	0	0	0	0	0	0	0	0	0	0	0	0
Aheto 2022	2022	Multilevel analysis of predictors of multiple indicators of childhood vaccination in Nigeria	To identify factors that predict vaccination uptake and coverage	National	National	Mixed Method	Analysis of secondary data	Childhood vaccines	6059	0	0	0	0	0	6059	0	0	0	0	0	0	0	0	0	0	0		#NULL!	0	0	0	0	0	0	0	0	0	0	0	0	0	0	0	1	0	0	0	0	0
Lawal 2023	2023	Spatio-temporal analysis of childhood vaccine uptake in Nigeria: a hierarchical Bayesian Zero-inflated Poisson approach	to explore the Spatio-temporal distribution and the factors associated with the number of doses of childhood vaccine uptake among children aged 12â€“23 months from 2003 to 2018 in Nigeria	National	National	Mixed Method	Analysis of secondary data	Childhood vaccines	9564	0	0	0	0	0	9564	0	0	0	0	0	0	0	0	0	0	0	Care-give related; Health-system related; Community/Social context	#NULL!	0	0	0	0	0	0	0	0	0	0	0	0	1	1	1	0	0	0	0	0	0
Ijarotimi 2018	2018	Urbanâ€“rural differences in immunisation status and associated demographic factors among children 12-59 months in a southwestern state, Nigeria	to determine the immunisation status and associated emographic factors among under-5 children and their caregivers in Akinyele Local Govern- ment Oyo State, Nigeria	Oyo	SW	Qualitative	Questionnaire	Childhood vaccines	449	0	0	0	0	0	449	0	0	0	0	0	0	0	0	0	0	0		#NULL!	0	0	0	0	0	0	0	0	0	0	0	0	0	0	0	0	0	0	0	0	0
Babalola 2009	2009	Determinants of the Uptake of the Full Dose of Diphtheriaâ€“Pertussisâ€“Tetanus Vaccines (DPT3) in Northern Nigeria: A Multilevel Analysis	to determine the role of measured individual and households characterisstics on vaccine uptake	National	National	Mixed Method	Analysis of secondary data	Diphtheria, Tetanus, and Pertussis (DTaP) Vaccine	1472	0	0	0	0	0	1472	0	0	0	0	0	0	0	0	0	0	0		#NULL!	0	0	0	0	0	0	1	0	0	0	0	0	0	0	0	0	0	0	0	0	0
Oluwatosin 2012	2012	Socio-demographic factors associated with childhood immunization uptake in Akinyele Local Government Area, Oyo State, Nigeria	to determine the socio-demographic factors associated with immunization completion	Oyo	SW	Qualitative	Surveys	Childhood vaccines	383	0	0	0	0	0	0	0	0	0	0	0	0	0	0	0	0	0		#NULL!	0	1	0	0	0	0	0	0	0	0	0	0	0	1	0	0	0	0	0	0	0
Antai 2010	2010	Migration and child immunization in Nigeria: individual- and community-level contexts	ssessed the individual- and community-level explanatory factors associated with child immunization differentials between migrant and non-migrant groups	National	National	Mixed Method	Analysis of secondary data	Childhood vaccines	2735	0	0	0	0	0	2735	0	0	0	0	0	0	0	0	0	0	0	Care-give related; Community/Social context	#NULL!	0	0	0	0	0	0	0	0	0	0	0	0	0	0	0	0	0	0	0	0	0
Chidiebere 2014	2014	Maternal sociodemographic factors that influence full child immunisation uptake in Nigeria	to identify the maternal sociodemographic f	National	National	Mixed Method	Analysis of secondary data	Childhood vaccines	24170	0	0	0	0	0	24170	0	0	0	0	0	0	0	0	0	0	0		#NULL!	0	1	0	0	0	0	0	0	0	0	0	0	1	1	1	1	1	0	0	0	0
Adedokun 2017	2017	Incomplete childhood immunization in Nigeria: a multilevel analysis of individual and contextual factors	to examine the independent effects of individual-, community- and state-level factors on incomplete childhood immunization in Nigeria	National	National	Mixed Method	Analysis of secondary data	Childhood vaccines	5743	0	0	0	0	0	5743	0	0	0	0	0	0	0	0	0	0	0		#NULL!	0	0	0	0	0	0	0	0	0	0	0	0	0	0	0	0	0	1	0	0	0
Antai 2012	2012	Gender inequities, relationship power, and childhood immunization uptake in Nigeria: a population-based cross-sectional study	to simultaneously examine the association between multiple dimensions of gender inequities and full childhood immunization	National	National	Mixed Method	Analysis of secondary data	Childhood vaccines	0	0	0	0	0	0	0	0	0	0	0	0	0	0	0	0	0	0	Care-give related; Health-system related; Community/Social context	#NULL!	0	0	0	0	0	0	0	0	0	0	0	0	0	0	0	0	0	0	0	0	0
Adeyanju 2022	2022	Understanding drivers of vaccine hesitancy among pregnant women in Nigeria: A longitudinal study	to adapt and validate the 5C scale for measuring vaccine hesitancy in Nigeria using two independent measurement points from the same participants (pre-post)	FCT	NC	Qualitative	Interviews	Childhood vaccines	255	0	0	0	0	0	255	0	0	0	0	0	0	0	0	0	0	0		#NULL!	0	0	0	0	0	0	0	0	1	0	0	1	0	1	0	0	0	0	0	0	0
Ogbuabor 2021	2021	Prevalence and predictors of vaccine hesitancy among expectant mothers in Enugu metropolis, South-east Nigeria	determined the prevalence and correlates of vaccine hesitancy among pregnant women attending a university teaching hospital in Enugu metropolis, South-east Nigeria	Enugu	SE	Qualitative	Questionnaire	Childhood vaccines	0	0	0	0	0	0	0	0	0	0	0	0	0	0	0	0	0	0		#NULL!	0	0	0	0	0	0	0	0	0	0	0	0	0	0	0	0	0	0	0	0	0
MShuaibu 2016	2016	Mass immunization with inactivated polio vaccine in conflict zones â€“ Experience from Borno and Yobe States, North-Eastern Nigeria		Multi-states	Multi-sta	Qualitative	Questionnaire	Childhood vaccines	0	0	0	0	0	0	0	0	0	0	0	0	0	0	0	0	0	0		#NULL!	0	0	0	0	0	0	0	0	0	0	0	0	0	0	0	0	0	0	0	0	0
Sato 2020	2020	The effect of performance-based financing on child vaccinations in northern Nigeria	valuates the effect of Performance-Based Financing (PBF), an incentive scheme where health facilities are funded based on their performance, on the quantity of vaccinations carried out in Adamawa state. U	Adamawa	NE	Qualitative	Analysis of secondary data	Childhood vaccines	0	0	0	0	0	0	0	0	0	0	0	0	0	0	0	0	0	0		#NULL!	0	0	0	0	0	0	0	0	0	0	0	0	0	0	0	0	0	0	0	0	0
Kawakatsu 2020	2020	Cost-effectiveness of SMS appointment reminders in increasing vaccination uptake in Lagos, Nigeria: a multi-centered randomized controlled trial	to estimate the cost-effectiveness of the SMS text reminders in cli- entsâ€™ return visits to the health facilities for child vaccinations (incl. vitamin A supplementations), ante- natal care (ANC) and family planning (FP), in urban communities of Lagos, Nigeri	Lagos	SW	Qualitative	Observation	Childhood vaccines	9368	0	0	0	0	0	9368	0	0	0	0	0	0	0	0	0	0	0		#NULL!	0	0	0	1	0	0	0	0	0	0	0	0	0	0	0	0	0	0	0	0	0
Brown 2016	2016	Effects of Community Health Nurse-Led Intervention on Childhood Routine Immunization Completion in Primary Health Care Centers in Ibadan, Nigeria	his study, taking into consideration the existing evidence, employed and evaluated the individual and combined effects of remin- der/recall system and PHC immunization providersâ€™ training on routine childhood immunization completion among the study children.	Oyo	SW	Mixed Method	Questionnaire	Childhood vaccines	595	0	0	0	0	0	595	0	0	0	0	0	0	0	0	0	0	0		#NULL!	0	0	0	1	0	0	0	0	0	0	0	0	0	0	0	0	0	0	0	0	0
Korave 2021	2021	Internal displacement; an impediment to the successful implementation of planned measles supplemental activities in Nigeria, a case study of Benue State	We documented the activities aimed at targeting the IDPs and host communities, especially after the conclusion of microplans and the implication of population displacement during the measles vaccination campaign in Benue state.	Benue	NC	Qualitative	Interviews	Measles, Mumps, and Rubella (MMR) Vaccine	9374	0	0	0	0	0	0	0	0	0	0	0	0	0	0	0	0	9374		#NULL!	0	0	0	0	0	0	0	0	0	0	0	0	0	0	0	0	0	0	0	0	0
Nkwogu 2018	2018	Impact of engaging security personnel on access and polio immunization outcomes in security-inaccessible areas in Borno state, Nigeria	s the processes of engagement of security personnel to access security-compromised areas and the impact on immunization outcomes.	Borno	NE	Mixed Method	Analysis of secondary data	Polio Vaccine	0	0	0	0	0	0	0	0	0	0	0	0	0	0	0	0	0	0		#NULL!	0	0	0	0	0	0	0	0	0	0	0	0	0	0	0	0	0	0	0	0	0
Musa 2016	2016	Youth group engagement in noncompliant communities during supplemental immunization activities in Kaduna, Nigeria, in 2014	to describe the strategy of collaborating with recognized youth groups to reduce team harassment during vaccination campaigns and improve vac- cination coverage in noncompliant communities.	Kaduna	NW	Mixed Method	Analysis of secondary data	Polio Vaccine	0	0	0	0	0	0	0	0	0	0	0	0	0	0	0	0	0	0		#NULL!	0	0	0	0	0	0	0	0	0	0	0	0	0	0	0	0	0	0	0	0	0
Babakura 2021	2021	The challenges of insecurity on implementing vaccination campaign and its effect on measles elimination and control efforts: a case study of 2017/18 measles campaign in Borno state, Nigeria	to explore the challenges in implementing the measles campaign in 2017 and its effect on measles elimination and control efforts in Borno State.	Borno	NE	Mixed Method	Analysis of secondary data	Measles, Mumps, and Rubella (MMR) Vaccine	0	0	0	0	0	0	0	0	0	0	0	0	0	0	0	0	0	0		#NULL!	0	0	0	0	0	0	0	0	0	0	0	0	0	0	0	0	0	0	0	0	0
Obi-Jeff 2020	2020	Vaccine indicator and reminder band to improve demand for vaccination in Northern Nigeria: A qualitative evaluation of implementation outcomes	to assess the acceptability of the band as a wearable reminder for infant vaccination in Kebbi State, Nigeria	Kebbi	NW	Qualitative	Interviews	Childhood vaccines	503	0	0	0	0	0	0	0	0	0	0	0	0	0	0	0	0	503	Care-give related	#NULL!	0	0	0	1	0	0	0	0	0	0	0	0	0	0	0	0	0	0	0	0	0
Nasiru 2012	2012	Breaking community barriers to polio vaccination in northern Nigeria: the impact of a grass roots mobilization campaign (Majigi)	examines the impact of a community-based intervention on the trends in the uptake of pol io vaccination fol lowing a community mobi l ization campaign for pol io eradication in northern Nigeria.	Kano	NW	Qualitative	Analysis of secondary data	Polio Vaccine	0	0	0	0	0	0	0	0	0	0	0	0	0	0	0	0	0	0		#NULL!	0	0	0	0	0	0	0	0	0	0	0	0	0	0	0	0	0	0	0	0	0
Afolabi 2021	2021	Ethnicity as a cultural factor influencing complete vaccination among children aged 12-23 months in Nigeria	to explore patterns and determinants of complete vaccination among children of Hausa/Fulani, Igbo and Yoruba, the predominant ethnicities in Nigeria.	National	National	Mixed Method	Analysis of secondary data	Childhood vaccines	0	0	0	0	0	0	0	0	0	0	0	0	0	0	0	0	0	0	Care-give related; Community/Social context	#NULL!	0	0	0	0	0	0	0	0	0	0	0	0	0	0	0	0	0	0	0	0	0
Dougherty 2020	2020	Engaging traditional barbers to identify and refer newborns for routine immunization services in Sokoto, Nigeria: a mixed methods evaluation	we evaluate the degree to which newborn identification and referral by traditional barbers affected immunization coverage for birth antigens, as well as examining the challenges and enabling factors experienced	Sokoto	NW	Mixed Method	Questionnaire	Childhood vaccines	2639	0	0	0	0	0	2639	0	0	0	0	0	0	0	0	0	0	0		#NULL!	0	1	0	1	0	0	0	0	0	0	0	0	0	0	0	0	0	0	0	0	0
Sato 2020	2020	Differential determinants and reasons for the non-and partial vaccination of children among Nigerian caregivers	differentiate reasons for incomplete vaccination by status: not- and partially- vaccinated, and examine the association between sociodemographic characteristics of caregivers and reasons for incom- plete vaccination	National	National	Mixed Method	Analysis of secondary data	Childhood vaccines	14445	0	0	0	0	0	0	0	0	0	0	0	0	0	0	0	0	14445		#NULL!	0	0	0	0	0	0	1	0	0	0	0	0	1	1	1	0	0	0	0	0	0
Sato 2020	2020	Fear, knowledge, and vaccination behaviors among women in Northern Nigeria	The present study contributes to the literature by providing one of the first evidence on how the vaccine hesitancy, espe- cially the fear of vaccination, is correlated with knowledge, behaviors, and perceptions around vaccination among Nigerian women.	Adamawa	NE	Qualitative	Questionnaire	Childhood vaccines	0	0	0	0	0	0	0	0	0	0	0	0	0	0	0	0	0	0		#NULL!	0	0	0	0	0	0	0	0	0	0	0	0	0	0	0	0	0	0	0	0	0
Korir 2018	2018	Targeting the last polio sanctuaries with Directly Observed Oral Polio Vaccination (DOPV) in northern Nigeria, (2014â€“2016)	This study describes the rationale and processes used to implement directly observed polio vaccinations in Nigeria to improve uptake of polio vaccines in settle- ments with chronically missed children due to conceal- ment of non-compliance by p	Multi-states	Multi-sta	Qualitative	Observation	Polio Vaccine	0	0	0	0	0	0	0	0	0	0	0	0	0	0	0	0	0	0		#NULL!	0	0	0	0	0	0	0	0	0	0	0	0	0	0	0	0	0	0	0	0	0
Onyeneho 2015	2015	Compliance With Regimens of Existing Vaccines in Orumba North Local Government Area of Anambra State, Nigeria	to identify the factors associated with compliance to required regimen of existing vaccine antigens in Anambra state, Nigeria.	Anambra	SE	Qualitative	Questionnaire	Diphtheria, Tetanus, and Pertussis (DTaP) Vaccine	600	0	0	0	0	0	600	0	0	0	0	0	0	0	0	0	0	0		#NULL!	0	0	0	0	0	0	0	0	0	1	0	1	1	0	0	0	0	0	0	0	0
Omoleke 2017	2017	A pilot study of routine immunization data quality in Bunza Local Government area: causes and possible remedies	to identify source(s) and evaluate the magnitude of poor data quality as well as propose recommendations to address the problem	Sokoto	NW	Qualitative	Questionnaire	Childhood vaccines	0	0	0	0	0	0	0	0	0	0	0	0	0	0	0	0	0	0		#NULL!	0	0	0	1	0	0	0	0	0	0	0	0	0	0	0	0	0	0	0	0	0
Masresha 2020	2020	The use of WhatsApp group messaging in the coordination of measles supplemental immunization activity in Cross Rivers State, Nigeria, 2018	to look into the experience of using WhatsApp as a coordination tool in the context of the implementation of measles SIAs in Cross Rivers State (CRS) in Nigeria.	CrossRiver	SS	Qualitative	Analysis of secondary data	Childhood vaccines	55	0	0	0	0	0	0	0	0	0	0	0	0	0	0	0	0	0		#NULL!	0	0	0	1	0	0	0	0	0	0	0	0	0	0	0	0	0	0	0	0	0
Itimi 2012	2012	Community participation and childhood immunization coverage: a comparative study of rural and urban communities of Bayelsa State, south-south Nigeria	to assess the possible effects of greater community participation on immunization coverage, by comparing the immunization coverage in a rural community with a functional community health committee, with an urban community, with no distinct community structure	Bayelsa	SS	Qualitative	Questionnaire	Childhood vaccines	558	0	0	0	0	0	558	0	0	0	0	0	0	0	0	0	0	0		#NULL!	0	0	0	0	0	0	0	0	0	0	0	0	0	0	0	0	0	0	0	0	0
Okenwa 2019	2019	Maternal reasons for non-receipt of valid Hepatitis B birth dose among mother-infant pairs attending routine immunization clinics, South-east, Nigeria	ssessed the uptake of valid HepB-BD and the reasons given by mothers of infants for not receiving the HepB-BD in Enugu State, South-east Nigeria.	Enugu	SE	Qualitative	Questionnaire	Hepatitis B Vaccine	344	0	0	0	0	0	344	0	0	0	0	0	0	0	0	0	0	0	Care-give related	#NULL!	0	0	0	0	0	0	0	0	0	0	0	0	0	0	0	0	0	0	0	0	0
Michael 2014	2014	An evaluation of community perspectives and contributing factors to missed children during an oral polio vaccination campaignâ€“Katsina State, Nigeria	o provide empirical evidence to assist polio eradication partners to develop new communica- tion approaches and programmatic strategies to address the chronic issue of missed children in Nigeria.	Katsina	NW	Qualitative	Questionnaire	Polio Vaccine	124	0	0	0	0	0	124	0	0	0	0	0	0	0	0	0	0	0		#NULL!	0	0	0	0	0	0	0	0	0	0	0	0	0	0	0	0	0	0	0	0	0
Gooding 2019	2019	Impact of vaccine stockouts on immunization coverage in Nigeria	to estimate the effect of vaccine availabil- ity on routine immunization coverage in Nigeria and to identify factors which affect this relationship. We account for demographic, health system, and vaccine supply effects.	National	National	Mixed Method	Analysis of secondary data	Childhood vaccines	0	0	0	0	0	0	0	0	0	0	0	0	0	0	0	0	0	0	Health-system related	#NULL!	0	0	0	0	0	0	0	0	0	0	0	0	0	0	0	0	0	0	0	0	0
Mangal 2014	2014	Key issues in the persistence of poliomyelitis in Nigeria: a case-control study	to quantitatively analyse the key factors sustaining transmission of poliomyelitis in Nigeria and to calculate clinical effi cacy estimates for the oral poliovirus vaccines (OPV) currently in use.	National	National	Quantitative	Analysis of secondary data	Polio Vaccine	0	0	0	0	0	0	0	0	0	0	0	0	0	0	0	0	0	0		#NULL!	0	0	0	0	0	0	0	0	0	0	0	0	0	0	0	0	0	0	0	0	0
Umoke 2021	2021	Investigating Factors Associated with Immunization Incompletion of Children Under Five in Ebonyi State, Southeast Nigeria: Implication for Policy Dialogue	To investigate factors associated with immunization incompletion of children under 5 years in Ebonyi state, Southeastern part of Nigeria.	Ebonyi	SE	Qualitative	Questionnaire	Childhood vaccines	374	0	0	0	0	0	374	0	0	0	0	0	0	0	0	0	0	0		#NULL!	0	0	0	0	0	0	0	0	0	0	0	0	0	0	0	0	0	0	0	0	0
Sibeudu 2017	2017	Investigating socio-economic inequity in access to and expenditures on routine immunization services in Anambra state	investigating the levels of access and utilization of RI services amongst dif-ferent socio-economic status (SES) groups	Anambra	SE	Qualitative	Questionnaire	Childhood vaccines	338	0	0	0	0	0	338	0	0	0	0	0	0	0	0	0	0	0		#NULL!	0	0	0	0	0	0	0	0	0	0	0	0	0	0	1	0	0	0	0	0	0
Balogun 2021	2021	Effect of intensive training in improving older women's knowledge and support for infant vaccination in Nigerian urban slums: a before-and-after intervention study	to determined the impact of training of older women on their knowledge and support for infant vaccination in selected urban slum communities in Ibadan, Niger	Oyo	SW	Qualitative	Observation	Childhood vaccines	109	0	0	0	0	0	0	0	0	0	0	109	0	0	0	0	0	0		#NULL!	0	0	0	0	0	0	1	0	0	0	0	0	0	0	0	0	0	0	0	0	0
Sato 2019	2019	Effect of armed conflict on vaccination: evidence from the Boko haram insurgency in northeastern Nigeria	valuates the causal effect of the Boko Haram insurgency in northeastern Nigeria on the vaccination rate	Borno	NE	Mixed Method	Analysis of secondary data	Childhood vaccines	2414	0	0	0	0	0	0	0	0	0	0	0	0	0	0	0	0	2414		#NULL!	0	0	0	0	0	0	0	0	0	0	0	0	0	1	0	0	0	0	0	0	0
Adegboye 2013	2013	Multi-year trend analysis of childhood immunization uptake and coverage in Nigeria	TO evaluates the uptake of childhood immunization in Nigeria from 1990 to 2008.	National	National	Mixed Method	Analysis of secondary data	Childhood vaccines	46130	0	0	0	0	0	46130	0	0	0	0	0	0	0	0	0	0	0		#NULL!	0	0	0	0	0	0	0	0	0	0	0	0	1	0	0	0	1	0	0	0	0
Anichukwu 2019	2019	The impact of maternal health care utilisation on routine immunisation coverage of children in Nigeria: a cross-sectional study	o examine the impact of maternal healthcare (MHC) utilisation on routine immunisation coverage of children in Nigeria.	National	National	Mixed Method	Analysis of secondary data	Childhood vaccines	5506	0	0	0	0	0	5506	0	0	0	0	0	0	0	0	0	0	0	Care-give related; Health-system related	#NULL!	0	0	0	0	0	0	0	0	0	0	0	0	0	0	0	0	0	0	0	0	0
Taylor 2017	2017	Understanding vaccine hesitancy in polio eradication in northern Nigeria	to understand factors at household and commu- nity level associated with propensity to refuse polio vaccine	Multi-states	Multi-sta	Qualitative	Interviews	Polio Vaccine	1653	0	0	0	0	0	0	0	0	0	0	0	0	0	0	0	0	0		#NULL!	0	0	0	0	0	0	0	0	0	1	0	0	0	1	1	0	0	0	0	0	0
Adedire 2016	2016	Immunisation coverage and its determinants among children aged 12-23 months in Atakumosa-west district, Osun State Nigeria: a cross-sectional study	to assess RI uptake and its determinants among children in Atakumosa-west district of Osun State.	Osun	SW	Mixed Method	Questionnaire	Childhood vaccines	750	0	0	0	0	0	750	0	0	0	0	0	0	0	0	0	0	0	Care-give related	#NULL!	0	0	0	0	0	0	0	0	0	1	0	0	1	0	0	1	0	0	0	0	0
Fatiregun 2014	2014	Determinants of uptake of third doses of oral polio and DTP vaccines in the Ibadan North Local Government Area of Nigeria	o assess determinants of uptake of the third doses of OPV3 and DTP3 among infants who received first doses of either or both vaccines at immunisation centres between February and September 2012 in the Ibadan	Oyo	SW	Qualitative	Questionnaire	Diphtheria, Tetanus, and Pertussis (DTaP) Vaccine; Polio Vaccine	400	0	0	0	0	0	400	0	0	0	0	0	0	0	0	0	0	0	Care-give related; Health-system related; Community/Social context	#NULL!	0	1	0	0	0	0	0	0	0	0	0	0	0	0	0	1	0	1	0	0	0
Ataguba 2016	2016	Explaining socio-economic inequalities in immunization coverage in Nigeria	to assess inequalities in full and partial immunization coverage in Nigeria. I	National	National	Mixed Method	Analysis of secondary data	Childhood vaccines	0	0	0	0	0	0	0	0	0	0	0	0	0	0	0	0	0	0		#NULL!	0	0	0	0	0	0	0	0	0	0	0	0	0	0	0	0	0	0	0	0	0
Uthman et al 2017	2017	Children who have received no routine polio vaccines in Nigeria: Who are they and where do they live?	examined the extent of geographical disparities in childhren not vaccinated against polio and examined individual- and community-level predictors of nonvaccination in Nigeria.	National	National	Mixed Method	Analysis of secondary data	Polio Vaccine	5734	0	0	0	0	0	0	0	0	0	0	0	0	0	0	0	0	5734		#NULL!	0	0	0	0	0	0	0	0	0	0	0	0	0	0	0	0	0	0	0	0	0
Taiwo 2017	2017	Factors affecting access to information on routine immunization among mothers of under 5 children in Kaduna State Nigeria, 2015	to examine the associations between knowledge, perception and information on routine immunization received by mothers or caregivers in Kaduna State	Kaduna	NW	Qualitative	Questionnaire	Childhood vaccines	379	0	0	0	0	0	379	0	0	0	0	0	0	0	0	0	0	0		#NULL!	0	0	0	0	0	0	0	0	0	0	0	0	0	0	0	0	0	0	0	0	0
Okoro 2015	2015	Sociodemographic influences on immunization of children with chronic neurological disorders in Enugu, Nigeria		Enugu	SE	Qualitative	Questionnaire	Childhood vaccines	379	0	0	0	0	0	379	0	0	0	0	0	0	0	0	0	0	0		#NULL!	0	0	0	0	0	0	0	0	0	0	0	0	0	0	0	0	0	0	0	0	0
Okenwa 2020	2020	Maternal knowledge and infant uptake of valid hepatitis B vaccine birth dose at routine immunization clinics in Enugu Stateâ€“Nigeria	to ssess and identy the predictors of maternal knowledge and infantsâ€™ uptake of valid hepatitis B vaccine birth dose (HepB-BD)	Enugu	SE	Qualitative	Questionnaire	Hepatitis B Vaccine	344	0	0	0	0	0	344	0	0	0	0	0	0	0	0	0	0	0		#NULL!	0	0	0	0	0	0	0	0	0	1	0	0	0	1	0	0	0	0	0	0	0
Obanewa 2020	2020	The role of place of residency in childhood immunisation coverage in Nigeria: analysis of data from three DHS rounds 2003â€“2013	xplored the associations between child, household, community and health system level factors and FIC, in particular focussing on urban formal and slum, and rural residence, using representative Nigeria Demographic Health Survey (NDHS) data from 2003, 2008 and 2013	National	National	Mixed Method	Analysis of secondary data	Childhood vaccines	11844	0	0	0	0	0	0	0	0	0	0	0	0	0	0	0	0	11844		#NULL!	0	0	0	0	0	0	0	0	0	0	0	0	0	0	0	0	0	0	0	0	0
NWANGWU 2021	2021	Cross-sectional Survey on Parental Perception and Attitude on Measles Vaccine: Low Hospital Measles Case Presentation in Rural Area in Enugu Nigeria.	o assess the parental knowledge of measles, attitude to measles vaccine and practice of case notification in a rural area in Enugu Nigeria	Enugu	SE	Qualitative	Questionnaire	Measles, Mumps, and Rubella (MMR) Vaccine	213	0	0	0	0	0	213	0	0	0	0	0	0	0	0	0	0	0	Care-give related	#NULL!	0	0	0	0	0	0	0	0	0	0	0	0	0	0	0	0	0	0	0	0	0
Yau 2023	2023	Improving the timeliness and completeness of childhood vaccination through color-coded bracelets: a pilot study among Fulani tribe populations in Nigeria	The effects of locally adapted interventions on vac- cination timeliness and completeness were studied amongst Fulani populations across 6 health facilities in 2 districts of Bauchi State, Nigeria.	Bauchi	NE	Qualitative	Observation	Childhood vaccines	0	0	0	0	0	0	0	0	0	0	0	0	0	0	0	0	0	0		#NULL!	1	0	0	1	0	0	0	0	0	0	0	0	0	0	0	0	0	0	0	0	0
Monguno 2013	2013	Socio cultural and geographical determinants of child immunisation in Borno State, Nigeria	o analyse geo- graphical and socio cultural factors as determi- nants of child immunisation.	Borno	NE	Mixed Method	Analysis of secondary data	Childhood vaccines	184	0	0	0	0	0	0	0	0	0	0	0	0	0	0	0	0	184		#NULL!	0	0	0	0	0	0	0	0	0	0	0	0	0	0	0	0	0	0	0	0	0
Duru 2019	2019	Contributions of volunteer community mobilizers to polio eradication in Nigeria: the experiences of non-governmental and civil society organizations	explores the contributions of the 2,130 VCMs deployed in 31 participating local government areas in the five implementing CGPP states from 2014 to 2017 to increase awareness, understanding, and acceptance of polio immunization.	National	National	Mixed Method	Other: all	Childhood vaccines	2262	0	0	0	0	0	0	0	0	2250	0	0	0	12	0	0	0	0		#NULL!	0	0	0	0	0	0	0	0	0	0	0	0	0	0	0	0	0	0	0	0	0
Gunnala 2016	2016	Routine Vaccination Coverage in Northern Nigeria: Results from 40 District-Level Cluster Surveys, 2014-2015	to conduct RI coverage surveys in 40 polio high-risk LGAs across eight states in northern Nigeria during 2014â€“2015.	Multi-states	Multi-sta	Mixed Method	All	Childhood vaccines	7815	0	0	0	0	0	0	0	0	0	0	0	0	0	0	0	0	7815		#NULL!	0	0	0	0	0	0	0	0	0	1	0	1	0	0	0	0	0	0	0	0	0
Uwaibi 2021	2021	Assessment of healthcare workerâ€™s implementation of childhood routine immunization in primary healthcare centers in Edo State, Nigeria: A mixed method survey	to find out health workers challenges to implementation of RI.	Edo	SS	Mixed Method	Focus Groups	Childhood vaccines	295	0	0	0	295	0	0	0	0	0	0	0	0	0	0	0	0	0		#NULL!	0	0	0	0	0	0	0	0	0	0	0	0	0	0	0	0	0	0	0	0	0
Oleribe et al 2017	2017	Individual and socioeconomic factors associated with childhood immunization coverage in Nigeria	to identify the individual and socioeconomic factors associated with immunization coverage in Nigeria through a secondary dataset analysis of Nigeria Demographic and Health Survey (NDHS), 2013	National	National	Quantitative	Analysis of secondary data	Childhood vaccines	31482	0	0	0	0	0	31482	0	0	0	0	0	0	0	0	0	0	0		#NULL!	0	1	0	0	0	0	0	0	0	0	0	0	1	1	1	0	1	1	0	0	0
Oku et al 2017	2017	Perceptions and experiences of childhood vaccination communication strategies among caregivers and health workers in Nigeria: A qualitative study	to explore the perceptions and experiences of caregivers and health work- ers in Nigeria on vaccination communication strategies implemented in their settings.	Multi-states	Multi-sta	Qualitative	Other: all	Childhood vaccines	100	0	0	0	0	0	78	0	1	1	14	6	0	0	0	0	0	0		#NULL!	0	0	0	0	0	0	0	0	0	0	0	0	0	0	0	0	0	0	0	0	0
Ignis et al 2022	2022	Vaccination Coverage: Vaccine-Related Determinants & Anthropometric Measures in Children Resident in a Rural Community in Nigeria	o identify vaccine-related determinants of childhood vaccination as well as determine the relationship between childhood vaccination status and body weight, height, and a childâ€™s body mass index (BMI)	Cross-Rivers	SS	Qualitative	Questionnaire	Childhood vaccines	608	0	0	0	0	0	0	0	0	0	0	0	0	0	0	0	0	0		#NULL!	0	0	0	0	0	0	0	0	0	0	0	0	0	0	0	0	0	0	0	0	0
Danjuma 2020	2020	At-birth vaccination timeliness: An analysis of inborns in the highlands of Jos, North-Central Nigeria	to determine the timeliness, barriers and predictors for delayed at-birth vaccinations.	Plateau	NC	Mixed Method	Questionnaire	Childhood vaccines	355	0	0	0	0	0	355	0	0	0	0	0	0	0	0	0	0	0		#NULL!	0	0	0	0	0	0	0	0	0	0	0	0	0	0	0	0	0	0	0	0	0
Abad et al 2021	2021	A rapid qualitative assessment of barriers associated with demand and uptake of health facility-based childhood immunizations and recommendations to improve immunization service delivery in Sokoto State, Northwest Nigeria, 2017	to understand factors associated with persistent low vaccination demand and uptake, and recommendations to improve health facility-based childhood immunization services in Sokoto State, Nigeria	Sokoto	NW	Qualitative	Other: Focus group discussions (FGDs) and in-depth interviews	Childhood vaccines	193	0	0	0	0	48	57	0	3	4	27	0	4	3	21	0	29	0		#NULL!	0	0	0	0	0	0	0	0	0	0	0	0	0	0	0	0	0	0	0	0	0
Rahji et al 2013	2013	Factors Influencing Compliance with Immunization Regimen among Mothers in Ibadan, Nigeria	to examines factors influencing compliance with immunization regimen among nursing mothers in Moniya Community Ibadan, Nigeria	Oyo	SW	Qualitative	Questionnaire	Childhood vaccines	153	0	0	0	0	0	0	0	0	0	0	0	0	0	0	0	0	0		#NULL!	0	0	0	0	0	0	0	0	0	0	0	1	0	0	0	0	0	0	0	0	0
Ghani 2015	2015	Factors Associated with Polio Immunization Resistivityin Kano State, Nigeria	to identify the factors and reasons responsible for immunization rejection on the part of parent and the entire community and at the same time studying and investigating the factors that influence compliance and resistivity of community engagement towards polio immunization programs	Kano	NW	Quantitative	Questionnaire	Childhood vaccines	378	0	0	0	0	301	77	0	0	0	0	0	0	0	0	0	0	0		#NULL!	0	1	0	0	0	0	0	0	0	0	0	1	0	0	0	0	0	0	0	0	0
Victoria 2023	2023	ROUTINE IMMUNIZATION COMPLIANCE AMONG NURSING MOTHERS IN IBADAN NORTH EAST LOCAL GOVERNMENT, OYO STATE, NIGERIA	explores routine immunization compliance among nursing mothers in Ibadan North East Local Government, Oyo State, Nigeria,	Oyo	SW	Qualitative	Questionnaire	Childhood vaccines	275	0	0	0	0	0	275	0	0	0	0	0	0	0	0	0	0	0		#NULL!	0	0	0	0	0	0	0	0	0	0	0	0	0	0	0	0	0	0	0	0	0
Tagbo 2014	2014	Parental acceptance of inactivated polio vaccine in Southeast Nigeria: A qualitative cross-sectional interventional study	o assess the aware- ness and acceptance of IPV	Anambra	SE	Qualitative	Interviews	Polio Vaccine	408	0	0	0	0	5	403	0	0	0	0	0	0	0	0	0	0	0		#NULL!	0	0	0	0	0	0	0	0	0	0	0	0	1	1	0	0	0	0	0	0	0
Oladepo 2019	2019	Nigerian rural mothersâ€™ knowledge of routine childhood immunizations and attitudes about use of reminder text messages for promoting timely completion	to assess mothersâ€™ knowledge in rural communities about routine immunization and acceptability of mobile phone reminder text messages as an intervention for improving uptake and timely comple- tion of routine immunization. T	Multi-states	Multi-sta	Qualitative	Questionnaire	Childhood vaccines	0	0	0	0	0	0	0	0	0	0	0	0	0	0	0	0	0	0		#NULL!	0	0	0	1	0	0	0	0	0	0	1	1	0	0	0	0	0	0	0	0	0
Ipsos	2021	Underlying attitudes and barriers towards children immunization in Nigeria	To provide rigorous and evidence-based information on the drivers and barriers to complete childhood immunisation in Nigeria	Multi-states	Multi-sta	Quantitative	Interviews	Childhood vaccines	2979	0	0	0	0	603	1264	0	0	0	0	581	531	0	0	0	0	0		#NULL!	0	0	0	0	0	0	0	0	0	0	0	0	0	0	0	0	0	0	0	0	0
Babalola 2023	2023	COMMUNITY AND SYSTEMIC FACTORS AFFECTING THE UPTAKE OF IMMUNISATION IN NIGERIA: A QUALITATIVE STUDY IN FIVE STATES	to identify community and systemic factors which would affect the uptake of immunisation in Nigeria.	Multi-states	Multi-sta	Mixed Method	Focus Groups	Childhood vaccines	0	0	0	0	0	0	0	0	0	0	0	0	0	0	0	0	0	0		#NULL!	0	0	0	0	0	0	0	0	0	1	0	1	0	0	0	0	0	0	0	1	0
Konwea 2018	2018	Determinants of compliance with child immunization among mothers of children under five years of age in Ekiti State, Nigeria	s to determine factors which influence mothersâ€™ compliance with childhood immunization	Ekiti	SW	Qualitative	Questionnaire	Childhood vaccines	600	0	0	0	0	0	600	0	0	0	0	0	0	0	0	0	0	0		#NULL!	0	0	0	0	0	0	0	0	0	1	0	0	0	1	0	0	0	0	0	0	0
Fajola 2018	2018	Immunization Completion Rates in a Cottage Hospital in the Niger Delta Area of Nigeria	o assess the effectiveness of vaccine delivery in a Community Cottage Hospital in the Niger Delta area of Nigeria by determining immunization completion and drop-out rates among infants registered in the facility from January 2014 to January 201	Rivers	SS	Mixed Method	Analysis of secondary data	Childhood vaccines	362	0	0	0	0	0	250	0	0	0	0	0	0	0	0	0	0	0		#NULL!	0	0	0	0	0	0	0	0	0	0	0	0	0	0	0	0	0	0	0	0	0
Ilusanya 2017	2017	Socio-Economic Factors Influencing Health Behavior of Women and Immunization Status of Children in Nigeria	to examine the Socio-economic factors influencing the health behavior of women and immunization status of children in Nigeria. Nigeria Demographic and Health Survey (NDHS)	National	National	Mixed Method	Analysis of secondary data	Childhood vaccines	26046	0	0	0	0	0	26046	0	0	0	0	0	0	0	0	0	0	0		#NULL!	0	0	0	0	0	0	0	0	0	0	0	0	0	0	0	0	0	0	0	0	0
Walker 2019	2019	Impact of Muslim opinion leadersâ€™ training of healthcare providers on the uptake of MNCH services in Northern Nigeria	o determine whether healthcare providers who were trained by MOLs differ from those who were not trained.	Katsina	NW	Qualitative	Questionnaire	Childhood vaccines	60	0	0	0	60	0	0	0	0	0	0	0	0	0	0	0	0	0		#NULL!	0	0	0	0	0	0	0	0	0	0	0	0	0	0	0	0	0	0	0	0	0
Fatiregun 2012	2012	Maternal determinants of complete child immunization among children aged 12â€“23 months in a southern district of Nigeria	to identify maternal characteris- tics associated with immunization coverage among children aged 12â€“23 months in the Umunneochi district of Abia State, Nigeria.	Abia	SE	Qualitative	Interviews	Childhood vaccines	525	0	0	0	0	0	525	0	0	0	0	0	0	0	0	0	0	0		#NULL!	0	0	0	0	0	0	0	0	0	0	0	1	0	1	0	0	0	0	0	0	0
Adekunle 1978	1978	Child immunizationâ€”What are the impediments for reaching desired goals in a transitional society?	to find out the major impediments to the use of preventive health services in Nigeria, and immunization	Oyo	SW	Qualitative	Interviews	Childhood vaccines	712	0	0	0	0	0	712	0	0	0	0	0	0	0	0	0	0	0	Care-give related; Health-system related; Community/Social context	#NULL!	0	0	0	0	0	0	0	0	0	0	0	0	0	0	0	0	0	0	0	0	0
Olorunsaiye 2016	2016	Variations in the Uptake of Routine Immunization in Nigeria: Examining Determinants of Inequitable Access	to assess the individual and state determinants of child immunization in Nigeria	National	National	Mixed Method	Analysis of secondary data	Childhood vaccines	0	0	0	0	0	0	0	0	0	0	0	0	0	0	0	0	0	0		#NULL!	0	0	0	0	0	0	0	0	0	0	0	0	0	1	1	0	0	0	0	0	0
Tobin-West 2012	2012	Identifying Barriers and Sustainable Solution to Childhood Immunization in Khana Local Government Area of Rivers State, Nigeria	o uncover barriers to childhood immunization in order to make recommendations that will address the problem in Rivers State and Nigeria.	Rivers	SS	Qualitative	Interviews	Childhood vaccines	1560	0	0	0	0	0	1560	0	0	0	0	0	0	0	0	0	0	0		#NULL!	0	0	0	0	0	0	0	0	0	0	0	0	0	0	0	0	0	0	0	0	0
Murele 2014	2014	Vaccine perception among acceptors and non-acceptors in Sokoto State, Nigeria	to explore the reasons for refusal or acceptance and to see how the HBM explains the vaccine behaviour of the people	Sokoto	NW	Qualitative	Interviews	Childhood vaccines	0	0	0	0	0	0	0	0	0	0	0	0	0	0	0	0	0	0		#NULL!	0	0	0	0	0	0	0	0	0	0	0	1	0	0	0	0	0	0	0	0	0
Balogun 2023	2023	Trends of infant vaccination timeliness and completion in selected urban slum communities in Ibadan, Southwestern Nigeria: A four-year review		Oyo	SW	Mixed Method	Analysis of secondary data	Childhood vaccines	5934	0	0	0	0	0	0	0	0	0	0	0	0	0	0	0	0	5934		#NULL!	0	0	0	0	0	0	0	0	0	0	0	0	0	0	0	0	0	0	0	0	0
Oluwadare 2009	2009	The Social Determinants of Routine Immunisation in Ekiti State of Nigeria	to provide an overview of routine immunization in Ekiti State of Nigeria. T	Ekiti	SW	Qualitative	Interviews	Childhood vaccines	0	0	0	0	0	0	0	0	0	0	0	0	0	0	0	0	0	0		#NULL!	0	0	0	0	0	0	0	0	0	0	0	0	0	0	0	0	0	0	0	0	0
McGavin 2018	2018	Childhood full and under-vaccination in Nigeria, 2013	to estimate full childhood immu- nization coverage in Nigeria and characterizes the association between vaccination status and urbanicity, region of residence, ethnicity, and other factor	National	National	Mixed Method	Analysis of secondary data	Childhood vaccines	5759	0	0	0	0	0	0	0	0	0	0	0	0	0	0	0	0	5759		#NULL!	0	1	0	0	0	0	0	0	0	0	0	0	0	1	1	0	0	0	0	0	0
Fatiregun 2021	2021	Missed opportunities for vaccination among children aged 0â€“23 months visiting health facilities in a southwest State of Nigeria, December 2019	to determine the magnitude of, explore the reasons for, as well as pos- sible solutions for reducing MOV in the State.	Ondo	SW	Mixed Method	All	Childhood vaccines	1497	0	0	0	628	0	869	0	0	0	0	0	0	0	0	0	0	0		#NULL!	0	0	0	0	0	0	0	0	0	0	0	0	0	0	0	0	0	0	0	0	0
Adeiga 2005	2005	Infant immunization coverage in difficult-to-reach area of Lagos metropolis	to investigate the reasons for failure to complete immunization	Lagos	SW	Qualitative	Interviews	Childhood vaccines	210	0	0	0	0	0	210	0	0	0	0	0	0	0	0	0	0	0	Care-give related; Health-system related; Community/Social context	#NULL!	0	0	0	0	0	0	0	0	0	0	0	0	0	0	0	0	0	0	0	0	0
Cockcroft 2014	2014	Why children are not vaccinated against measles: a cross-sectional study in two Nigerian States	We present here the quantitative survey findings about measles vaccination among children age 12-23 months and the factors related to vaccination status, together with qualitative findings from community focus groups that discussed the results of the survey.	Multi-states	Multi-sta	Qualitative	Interviews	Measles, Mumps, and Rubella (MMR) Vaccine	2836	0	0	0	0	0	2836	0	0	0	0	0	0	0	0	0	0	0		#NULL!	0	0	0	0	0	0	0	0	0	0	0	1	0	0	0	1	0	0	0	0	0
McArthur-Lloyd 2016	2016	Community Engagement, Routine Immunization, and the Polio Legacy in Northern Nigeria		National	National	Qualitative	Observation	Polio Vaccine	0	0	0	0	0	0	0	0	0	0	0	0	0	0	0	0	0	0		#NULL!	0	0	0	0	0	0	0	0	0	0	0	0	0	0	0	0	0	0	0	0	0
Obi-Jeff 2021	2021	Designing an SMS reminder intervention to improve vaccination uptake in Northern Nigeria: a qualitative study	to understand the drivers of low immunization uptake and the programmatic and telephonic context where the intervention would be deployed	Kebbi	NW	Qualitative	Interviews	Childhood vaccines	135	0	0	0	0	0	0	0	0	0	0	0	0	0	0	0	135	0		#NULL!	0	0	0	1	0	0	0	0	0	0	0	0	0	0	0	0	0	0	0	0	0
Okafor 2022	2022	â€œMen are the head of the family, the dominant headâ€: A mixed method study of male involvement in maternal and child health in a patriarchal setting, Western Nigeria	o assess menâ€™s knowledge, involvement in MCH and the barriers in Southwest Nigeria. Predictors of good knowledge and involvement were also assessed	Lagos	SW	Mixed Method	Other: all	Childhood vaccines	418	0	0	0	0	418	0	0	0	0	0	0	0	0	0	0	0	0		#NULL!	0	0	0	0	0	0	1	0	0	0	0	0	0	0	0	0	0	0	0	0	0
Limaye 2019	2019	Interpersonal and community influences affecting childhood vaccination decision-making among Nigerian caregivers: Perceptions among frontline workers in Nigeria	This exploratory qualitative study identified interpersonal and community level factors affecting childhood immunization uptake in Nigeria through the perspectives of frontline workers	FCT	NC	Qualitative	Focus Groups	Childhood vaccines	47	0	0	0	47	0	0	0	0	0	0	0	0	0	0	0	0	0		#NULL!	0	0	0	0	0	0	0	0	1	0	0	0	0	0	0	0	0	0	0	0	0
Ekhaguere 2019	2019	Automated phone call and text reminders for childhood immunisations (PRIMM): a randomised controlled trial in Nigeria	o test the feasibility and effect of pairing automated text and call reminders on immunisation completion in a semi-rural setting in Nigeria.	Ondo	SW	Qualitative	Observation	Childhood vaccines	250	0	0	0	0	0	250	0	0	0	0	0	0	0	0	0	0	0		#NULL!	0	0	0	1	0	0	0	0	0	0	0	0	0	0	0	0	0	0	0	0	0
Akwataghibe 2019	2019	Exploring Factors Influencing Immunization Utilization in Nigeriaâ€”A Mixed Methods Study	to assess and seek to explain the outcomes of the PAR implemented in Remo North to understand whether and possibly how it improved immunization utilization.	Ogun	SW	Mixed Method	Other: Survey and Interviews	Childhood vaccines	285	0	0	0	0	0	172	0	0	0	0	0	98	0	15	0	0	0	Care-give related; Health-system related; Community/Social context	#NULL!	0	0	0	0	0	0	0	0	0	1	0	0	0	1	0	1	0	0	0	0	0
Ozawa 2017	2017	Using best-worst scaling to rank factors affecting vaccination demand in northern Nigeria	This study applies best-worst scaling (BWS) to rank various factors affecting parentsâ€™ demand for outine childhood immunization.	Zamfara	NW	Qualitative	Surveys	Childhood vaccines	198	0	0	0	0	97	101	0	0	0	0	0	0	0	0	0	0	0		#NULL!	0	0	0	0	0	0	0	1	0	0	0	1	0	0	0	0	0	0	0	0	0
Nalley 2019	2019	Completeness and timeliness of immunization among children aged 12 to 23 months in South-South Nigeria	sessing completeness and timeliness of immunization among children aged 12 to 23 months in Alakahia, Rivers State	Rivers	SS	Qualitative	Questionnaire	Childhood vaccines	440	0	0	0	0	0	0	0	0	0	0	0	0	0	0	0	0	440		#NULL!	0	0	0	0	0	0	1	0	0	0	0	0	0	0	0	0	0	0	0	0	0
Odinaka et al 2023	2023	Acceptance of mobile phone short message service for childhood immunisation reminders by Nigerian mothers	o assess the acceptance of mobile phone text messaging for childhood immunisation reminders by Nigerian mothers as well as its determinants	Imo	SE	Qualitative	Questionnaire	Childhood vaccines	253	0	0	0	0	0	253	0	0	0	0	0	0	0	0	0	0	0	Care-give related	#NULL!	0	0	0	1	0	0	0	0	0	0	0	0	0	0	0	0	0	0	0	0	0
Adamu 2019	2019	Using the theoretical domains framework to explore reasons for missed opportunities for vaccination among children in Kano, Nigeria: a qualitative study in the pre-implementation phase of a collaborative quality improvement project	to explore the reasons for MOV from the perspective of caregivers of children aged 0â€“23 months attending primary health care (PHC) facilities in Nassarawa Local Government Area (LGA) of Kano State, Nigeria. This was to inform the implementation of a quality improvement program to reduce MOV	Kano	NW	Qualitative	Focus Groups	Childhood vaccines	30	0	0	0	0	0	30	0	0	0	0	0	0	0	0	0	0	0	Care-give related; Community/Social context	#NULL!	0	0	0	0	1	0	0	0	0	1	0	1	0	0	0	0	0	0	0	0	1
Akwataghibe 2021	2021	Using participatory action research to improve immunization utilization in areas with pockets of unimmunized children in Nigeria	to assesses and seeks to explain the outcomes of the PAR implemented in Remo North to understand whether and possibly how it improved immunization utilization	Ogun	SW	Mixed Method	Other: urvey (HHS), secondary data analysis of the NHMIS, focus group discussions (FGD) and semi-structured interviews (SSI).	Childhood vaccines	461	0	0	0	0	0	420	0	0	0	0	0	16	0	25	0	0	0		#NULL!	0	0	0	0	0	0	0	0	0	0	0	0	0	0	0	0	0	0	0	0	0
Obi-Jeff 2022	2022	Implementing SMS reminders for routine immunization in Northern Nigeria: a qualitative evaluation using the RE-AIM framework	ualitatively evaluated the implementa- tion of a SMS reminder intervention called the Immuni- zation Reminder and Information SMS System (IRISS) in Kebbi State, Northwest Nigeria. T	Kebbi	NW	Qualitative	Focus Groups	Childhood vaccines	0	0	0	0	0	0	0	0	0	0	0	0	0	0	0	0	0	0		#NULL!	0	0	0	1	0	0	0	0	0	0	0	0	0	0	0	0	0	0	0	0	0
Etokidem 2021	2021	Potential barriers to and facilitators of civil society organization engagement in increasing immunization coverage in Odukpani Local Government Area of Cross River State, Nigeria: an implementation research	o assess potential barriers to and facilitators of CSO engage- ment in increasing immunization coverage in Odukpani LGA of Cross River State, Nigeria	CrossRiver	SS	Qualitative	Focus Groups	Childhood vaccines	0	0	0	0	0	0	0	0	0	0	0	0	0	0	0	0	0	0		#NULL!	0	1	0	0	0	0	0	0	0	0	0	0	0	0	0	0	0	0	0	0	0
Olaniyan 2021	2021	The Socioecological Model as a framework for exploring factors influencing childhood immunization uptake in Lagos state, Nigeria	to identifies intrapersonal, interpersonal, organizational, community, and policy-level factors that influence childhood immunization uptake from various stakeholdersâ€™ perspectives using the Socioecological Model	Lagos	SW	Qualitative	Focus Groups	Childhood vaccines	87	0	19	0	0	0	44	0	24	0	0	0	0	0	0	0	0	0		#NULL!	1	0	0	0	0	0	1	0	0	1	1	0	0	0	0	0	0	0	0	0	0
Olaniyan 2022	2022	Barriers, facilitators, and recommendations for childhood immunisation in Nigeria: perspectives from caregivers, community leaders, and healthcare workers	to elucidate opportunities to advance childhood immunisation rates in Nigeria	Lagos	SW	Qualitative	Interviews	Childhood vaccines	89	0	0	0	19	0	68	0	0	0	0	0	0	0	0	0	0	0		#NULL!	1	0	0	0	0	0	1	0	0	1	1	0	0	0	0	0	0	0	0	0	0
Freeland 2023	2023	Barriers and facilitators to hepatitis B birth dose vaccination: Perspectives from healthcare providers and pregnant women accessing antenatal care in Nigeria	to assess barriers and facilitators of HepB-BD administration and uptake in Nigeria,	Adamawa	NE	Mixed Method	Other: all	Hepatitis B Vaccine	87	0	0	0	40	0	47	0	0	0	0	0	0	0	0	0	0	0		#NULL!	0	0	0	0	0	0	0	0	0	0	0	0	0	0	0	0	0	0	0	0	0
Oku 2017	2017	Factors affecting the implementation of childhood vaccination communication strategies in Nigeria: a qualitative study	to explore factors affecting the delivery of vaccination communication in Nigeria	Bauchi	NE	Mixed Method	Other: all	Childhood vaccines	0	0	0	0	0	0	0	0	0	0	0	0	0	0	0	0	0	0		#NULL!	0	0	0	1	0	0	0	0	0	0	0	0	0	0	0	0	0	0	0	0	0
Fagbamigbe et al 2023	2023	Evaluating the performance of different Bayesian count models in modelling childhood vaccine uptake among children aged 1223 months in Nigeria	to compare and identify the best Bayesian count modelling technique for the number of childhood vaccine uptake in Nigeria	National	National	Quantitative	Analysis of secondary data	Childhood vaccines	0	0	0	0	0	0	0	0	0	0	0	0	0	0	0	0	0	0		#NULL!	0	1	0	0	0	0	0	0	0	0	0	0	1	1	1	1	1	1	0	0	0
Akaba et al 2022	2022	Barriers and facilitators of access to maternal, newborn and child health services during the first wave of COVID-19 pandemic in Nigeria: findings from a qualitative study	to explore the barriers and facilitators of access to MNCH services during the first wave of COVID-19 pandemic in Nigeria.	National	National	Qualitative	Interview	Childhood vaccines	54	0	0	0	0	0	0	0	0	0	0	0	0	0	0	0	0	0		#NULL!	0	0	0	0	0	0	0	0	0	0	0	0	0	0	0	0	0	0	0	0	0
Ilesanmi et al 2023	2023	Exploring data trends and providers’ insights on measles immunization uptake in south-west Nigeria	to examine the coverage among Ekiti State Local Government Areas (LGA) and uncover enablers and barriers to effective provision and uptake of measles immunization services at a subregional level	Ekiti	SW	Mixed Method	Other: all	Measles	0	0	0	0	0	0	0	0	0	0	#NULL!	0	0	0	0	0	0	0		#NULL!	#NULL!	#NULL!	#NULL!	#NULL!	#NULL!	#NULL!	#NULL!	#NULL!	#NULL!	#NULL!	#NULL!	0	#NULL!	#NULL!	1	#NULL!	#NULL!	#NULL!	#NULL!	#NULL!	#NULL!
[truncated: 98 more columns]
